# Supplementary material for: Highly crystalline Fe2GeS4 nanocrystals: green synthesis and their structural and optical characterization
Source: Royal Society of Chemistry journal article supplement (doi:10.1039/c4ta05850j), 2014-11-27
Supplement: c4ta05850j1.pdf [file c4ta05850j1.pdf]

## Electronic Supplementary Information for

### Highly Crystalline Fe<sub>2</sub>GeS<sub>4</sub> Nanocrystals: Green Synthesis and Their Structural and Optical Characterization

Bo-In Park,<sup>‡a,b</sup> Seunggun Yu,<sup>‡a,c</sup> Yoonjung Hwang,<sup>d,e</sup> So-Hye Cho,<sup>a,e</sup> Jae-Seung Lee,<sup>b</sup>  
Cheolmin Park,<sup>c</sup> Doh-Kwon Lee,<sup>\*d,e</sup> and Seung Yong Lee,<sup>\*a,e</sup>

<sup>a</sup> Center for Materials Architecturing, Korea Institute of Science and Technology, Seoul 136-791, Korea

<sup>b</sup> Department of Materials Science and Engineering, Korea University, Seoul 136-701, Korea

<sup>c</sup> Department of Materials Science and Engineering, Yonsei University, Seoul 120-749, Korea

<sup>d</sup> Photo-electronic Hybrids Research Center, Korea Institute of Science and Technology, Seoul 136-791, Korea

<sup>e</sup> Department of Nanomaterials Science and Engineering, Korea University of Science and Technology, Daejeon 305-350, Korea

<sup>‡</sup>B.-I. Park and S. Yu equally contributed to this work.

<sup>\*</sup>Corresponding author: Dr. Doh-Kwon Lee (E-mail: dklee@kist.re.kr; Tel: +82-2-958-6710; Fax: +82-2-958-6649) and Dr. Seung Yong Lee (patra@kist.re.kr; Tel: +82-2-958-5381; Fax: +82-2-958-5529).

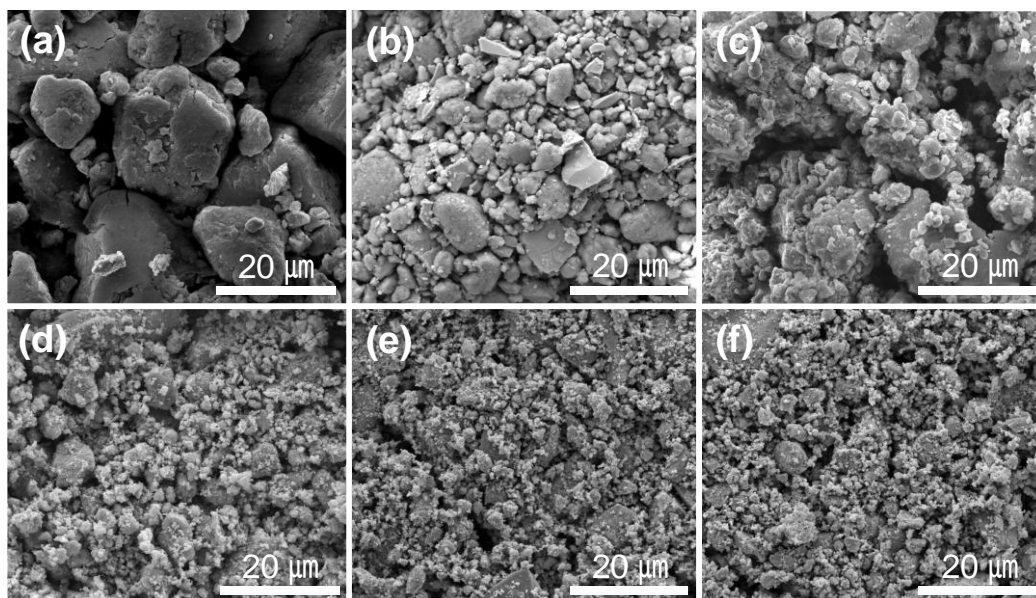

**Fig. S1.** SEM images of the powders after reaction periods of (a) 2 h, (b) 4 h, (c) 6 h, (d) 8 h, (e) 10 h, and (f) 12 h.

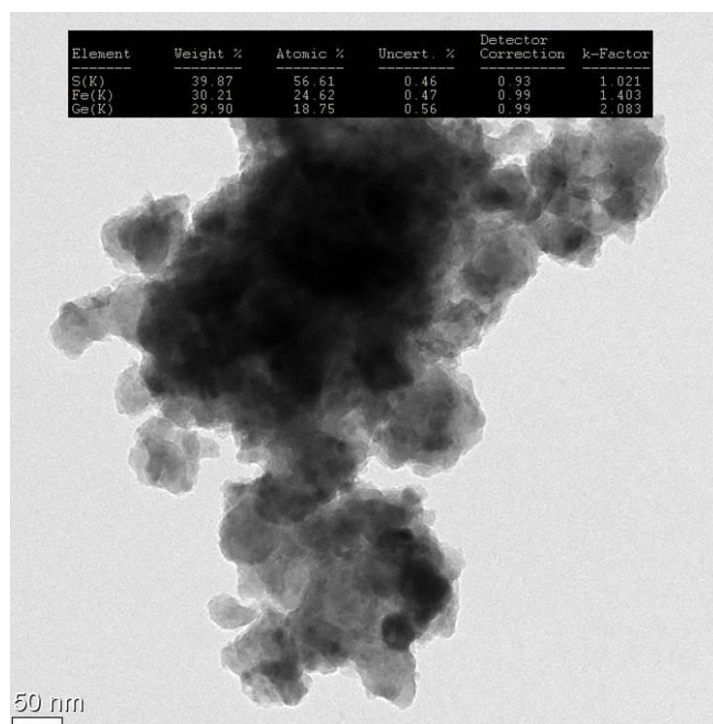

**Fig. S2.** TEM image and EDS results of as-synthesized  $\text{Fe}_2\text{GeS}_4$  nanopowder.

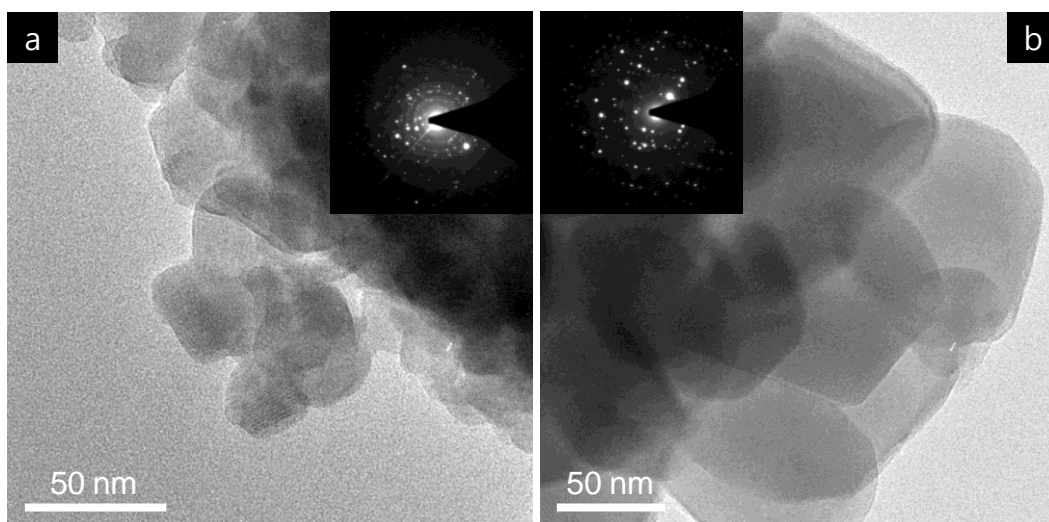

**Fig. S3.** TEM images and corresponding SAED patterns of (a) as-synthesized and (b) heat-treated  $\text{Fe}_2\text{GeS}_4$  nanocrystals.

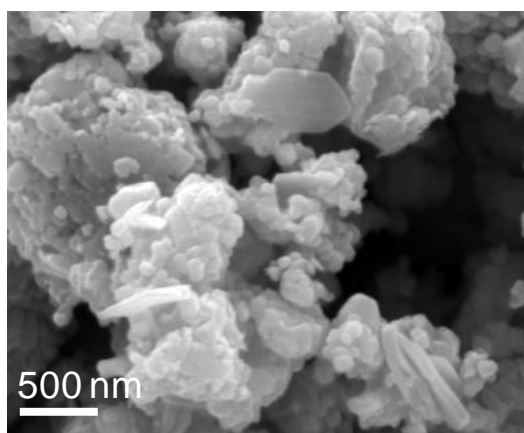

**Fig. S4.** SEM image of the  $\text{Fe}_2\text{GeS}_4$  powders after heat treatment at 450 °C for 2 h showing a few plate-like crystals.
